1 Nucleus specific expression in the multinucleated mushroom-  
2 forming fungus *Agaricus bisporus* reveals different nuclear  
3 regulatory programs

4 Thies Gehrman<sup>1,\*</sup>, Jordi F. Pelkmans<sup>2</sup>, Robin A. Ohm<sup>2</sup>, Aurin M. Vos<sup>2,#</sup>, Anton S.M.  
5 Sonnenberg<sup>3</sup>, Johan J.P. Baars<sup>3</sup>, Han A. B. Wösten<sup>2</sup>, Marcel J. T. Reinders<sup>1</sup>, Thomas Abeel<sup>1,4,\$</sup>

6 <sup>1</sup>Delft Bioinformatics Lab, Delft University of Technology, The Netherlands

7 <sup>2</sup>Microbiology, Utrecht University, The Netherlands

8 <sup>3</sup>Plant Breeding, Wageningen University and Research, The Netherlands

9 <sup>4</sup>Broad Institute of MIT and Harvard, USA

10 \*Current position: CBS/KNAW Westerdijk Fungal Biodiversity Institute, The Netherlands

11 #Current position: Department of Biotechnology, Delft University of Technology, The  
12 Netherlands

13 \$Corresponding author: T.Abeel@tudelft.nl

14

## 15 **Abstract**

16 **Motivation:** Fungi are essential in nutrient recycling in nature. They also form symbiotic,  
17 commensal, parasitic and pathogenic interactions with other organisms including plants, animals  
18 and humans. Many fungi are polykaryotic, containing multiple nuclei per cell. In the case of  
19 heterokaryons, there are even different nuclear types within a cell. It is unknown what the  
20 different nuclear types contribute in terms of mRNA expression levels in fungal heterokaryons.  
21 Each cell of the cultivated, mushroom forming basidiomycete *Agaricus bisporus* contains 2 to 25  
22 nuclei of two nuclear types, *P1* or *P2*, that originate from two parental strains. Using RNA-Seq  
23 data, we wish to assess the differential mRNA contribution of individual nuclear types in  
24 heterokaryotic cells and its functional impact.

25 **Results:** We studied differential expression between genes of the two nuclear types throughout  
26 mushroom development of *A. bisporus* in various tissue types. The two nuclear types, produced  
27 specific mRNA profiles which changed through development of the mushroom. The differential  
28 regulation occurred at a gene and multi-gene locus level, rather than the chromosomal or nuclear  
29 level. Although the *P1* nuclear type dominates the mRNA production throughout development,  
30 the *P2* type showed more differentially upregulated genes in important functional groups  
31 including genes involved in metabolism and genes encoding secreted proteins. Out of 5,090  
32 karyolelle pairs, i.e. genes with different alleles in the two nuclear types, 411 were differentially  
33 expressed, of which 246 were up-regulated by the *P2* type. In the vegetative mycelium, the *P2*  
34 nucleus up-regulated almost three-fold more metabolic genes and cazymes than *P1*, suggesting  
35 phenotypic differences in growth. A total of 10% of the differential karyollelle expression is

36 associated with differential methylation states, indicating that epigenetic mechanisms may be  
37 partly responsible for nuclear specific expression.

38 **Conclusion:** We have identified widespread transcriptomic variation between the two nuclear  
39 types of *A. bisporus*. Our novel method enables studying karyolles specific expression which  
40 likely influences the phenotype of a fungus in a polykaryotic stage. This is thus relevant for the  
41 performance of these fungi as a crop and for improving this species for breeding. Our findings  
42 could have a wider impact to better understand fungi as pathogens. This work provides the first  
43 insight into the transcriptomic variation introduced by genomic nuclear separation.

## 44 **Introduction**

45 Fungi are vital to many ecosystems, contributing to soil health, plant growth, and nutrient  
46 recycling<sup>1</sup>. They are key players in the degradation of plant waste<sup>2,3</sup>, form mutually beneficial  
47 relationships with plants by sharing minerals in exchange for carbon sources<sup>4,5</sup> and by inhibiting  
48 the growth of root pathogens<sup>6,7</sup>. They even form networks between plants, which can signal each  
49 other when attacked by parasites<sup>8</sup>. Yet, some are plant pathogens responsible for huge economic  
50 losses in crops<sup>9-11</sup>.

51 The genome organization of fungi is incredibly diverse and can change during the life cycle. For  
52 instance, sexual spores can be haploid with one or more nuclei or can be diploid. Sexual spores  
53 of mushroom forming fungi are mostly haploid and they form monokaryotic (one haploid  
54 nucleus per cell) or homokaryotic (two or more copies of genetically identical haploid nuclei)  
55 mycelia upon germination. Mating between two such mycelia results in a fertile dikaryon (one  
56 copy of the parental nuclei per cell) or heterokaryon (two or more copies of each parental nuclei)

57 when they have different mating loci<sup>12</sup>. In contrast to eukaryotes of other kingdoms, the nuclei  
58 do not fuse into di- or polyploid nuclei but remain side by side during the main part of the life  
59 cycle. Only just before spores are formed in mushrooms, do these nuclei fuse, starting the cycle  
60 anew.

## 61 Figure 1

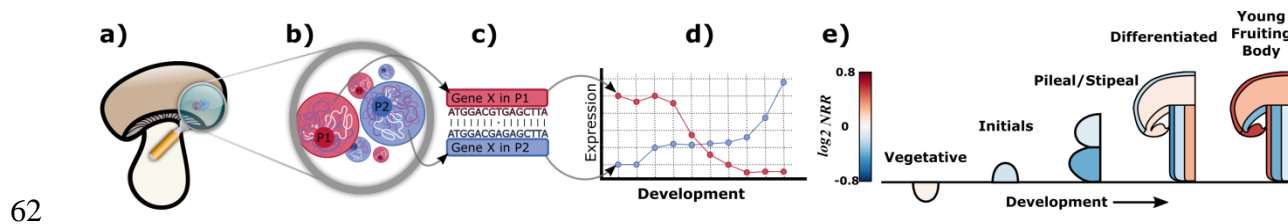

62  
63 *Figure 1: Nuclear type specific expression in A. bisporus. a) The A. bisporus mushroom is composed of different tissues that*  
64 *consist of hyphae comprised of cellular compartments. b) Each cellular compartment is a heterokaryon containing between 2 and*  
65 *25 nuclei. In our strain, each nucleus is either of type P1 (red) or P2 (blue). Both nuclear types are haploid, and contain exactly*  
66 *one copy of each gene. However, because there are multiple nuclei, there may be multiple copies of each gene in the cell. c)*  
67 *Furthermore, the gene in the two types, which we call karyolleles, may differ in their genetic sequences. d) These differences in*  
68 *transcript sequence allow us to quantify expression of each karyollele in each tissue and to investigate nucleus specific*  
69 *expression. e) Read count ratios at the nuclear type level (Equation 5) of Agaricus bisporus throughout its development. Red*  
70 *colour indicates higher P1 activity, blue colour higher P2 activity. The scale bar indicates the log2 fold change in activity*  
71 *between the P1 and P2 nuclear types. We observe a differential mRNA activity in different mushroom tissues.*

72

73 *Agaricus bisporus* is the most widely produced and consumed edible mushroom in the world<sup>2</sup>.  
74 Heterokaryotic mycelia of the button mushroom *Agaricus bisporus* var. *bisporus* (Sylvan A15  
75 strains) have between 2 and 25 nuclei per cell<sup>13,14</sup> (Figure 1a-d). The genomes of both ancestral  
76 homokaryons have been sequenced<sup>1,15</sup> showing that DNA sequence variation is associated with  
77 different vegetative growth capabilities<sup>1</sup>. Due to the two nuclear types, each gene exists at two  
78 alleles separated by nuclear membranes, which we call karyolleles. Although there have been a  
79 few studies investigating the expression of genetic variety in the transcriptome<sup>16,17</sup>, the  
80 differential transcriptomic activity of two (or more) nuclear types has never been systematically

81 investigated in a heterokaryon at the genome wide scale. Based on SNPs identified in mRNA  
82 sequencing, it has been suggested that allele specific expression is tightly linked to the ratio of  
83 the nuclear types in a basidiomycete<sup>18</sup>.

84 Allele specific expression in mononuclear cells has been studied in fungi<sup>19</sup>, plants<sup>20</sup>, animals<sup>21</sup>,  
85 and humans<sup>22</sup>. Such studies have shown that allele heterogeneity is linked to differential allele  
86 expression and cis-regulatory effects<sup>21-23</sup>, and even sub-genome dominance<sup>24</sup>. *A. bisporus* is in  
87 many ways an excellent model organism to investigate differential karyollele expression. It only  
88 has two nuclear types in the heterokaryon contrasting to the mycorrhizae that can have more  
89 nuclear types<sup>25,26</sup>, making computational deconvolution of mRNA sequence data intractable with  
90 currently available tools. Additionally, the recently published genomes of the two nuclear types  
91 of *Sylvan A15*<sup>15</sup> exhibit a SNP density of 1 in 98 bp allowing differentiation of transcripts in high  
92 throughput sequencing data. Finally, bulk RNA-Seq datasets of different stages of development  
93 and of different tissues of the fruiting bodies are available<sup>2,27</sup>.

94 Here, we show that differential karyollele expression exists in *Agaricus bisporus Sylvan A15*  
95 strain, which changes across tissue type and development and affects different functional groups.  
96 Further, we show that differential karyollele expression associates with differential methylation  
97 states, suggesting that epigenetic factors may be a cause for the differential regulation of  
98 karyolleles.

## 99 **Results**

### 100 **Karyollele specific expression through sequence differences**

101 To assign expression levels to individual karyolleles, we exploit sequence differences between  
102 karyollele pairs in the P1 and P2 homokaryon genomes of *A. bisporus* A15 strain (Materials).  
103 Briefly, the sequence differences define marker sequences for which the RNA-Seq reads  
104 uniquely match to either the P1 or the P2 variant, effectively deconvolving the mRNA  
105 expression from the two nuclear types (see Methods). There are a total of 5,090 distinguishable  
106 karyollele pairs between the *P1* and *P2* genomes, corresponding to ~46% of all genes. The  
107 remaining genes could not be unambiguously matched, or the karyollele pairs had too few  
108 sequences differences. Most (80%) distinguishable karyollele pairs had the same number of  
109 markers in each homokaryon. For the remaining pairs (20%), the number of markers per  
110 karyollele was different (see Supplementary Material Note A). This variation can be explained  
111 by the non-symmetric number of markers produced by the different kinds of variation. While a  
112 SNP will result in one marker in each karyollele, an indel (if longer than 21bp) will result in one  
113 marker in one karyollele, and at least two in the other. Karyollele specific expression is  
114 expressed as a read count ratio that reflects the relative abundance of mRNAs originating from  
115 the P1 or P2 nuclear types (Equation 3, Methods).

116 We studied *A. bisporus*' karyollele specific expression for different tissues and development in  
117 two RNA-Seq datasets, one studying the mycelium in compost throughout mushroom harvest,  
118 and one studying different mushroom tissues throughout mushroom formation (Figure 1e,  
119 Supplementary Material Notes B, and Materials). Measured difference in expression between  
120 nuclear types is not correlated with the number of markers ( $p > 0.05$ ) for any of the samples, nor  
121 is it correlated with CG content (see Supplementary Material Notes C).

122 **P1 and P2 mRNA production differs per tissue and across development**

123 First, we assess the total mRNA production of the P1 and P2 nuclear types and their relative  
124 contributions during development. To do this, we considered the total number of reads uniquely  
125 matching to P1 with respect to P2. Figure 1e shows that this nuclear type read count ratio (NRR,  
126 see Equation 5, Methods) changes throughout development and across tissue types. For example,  
127 during the ‘*Differentiated*’ stage, the P2 nuclei are dominant in the skin, but in the ‘*Young*  
128 *Fruiting Body*’, the P1 nuclei dominate the skin (two right most panels in Figure 1e). In contrast,  
129 the ‘*Stipe Center*’ is dominated by P1 nuclei in the differentiated stage, while later the expression  
130 of P2 nuclei dominates.

131 The transcription patterns throughout the mushroom development differ between the karyolleles.  
132 Based on a principal component analysis of the expression profiles of each nuclear type, we  
133 observe that the expression profiles of P1 and P2 group together in different clusters, based on  
134 the first and second principal components (Supplementary Material Note D). This clustering is  
135 indicative of distinct regulatory programs. It appears as though the first principal component  
136 represents the tissue type, and the second represents the nuclear type. Interestingly,  
137 measurements of the same tissue from P1 and P2 do not have exactly the same value for the first  
138 principal component, indicating that the difference in nuclear type does not entirely explain the  
139 variation between P1 and P2.

140 **Within a sample, mRNA production of P1 and P2 vary between chromosomes**

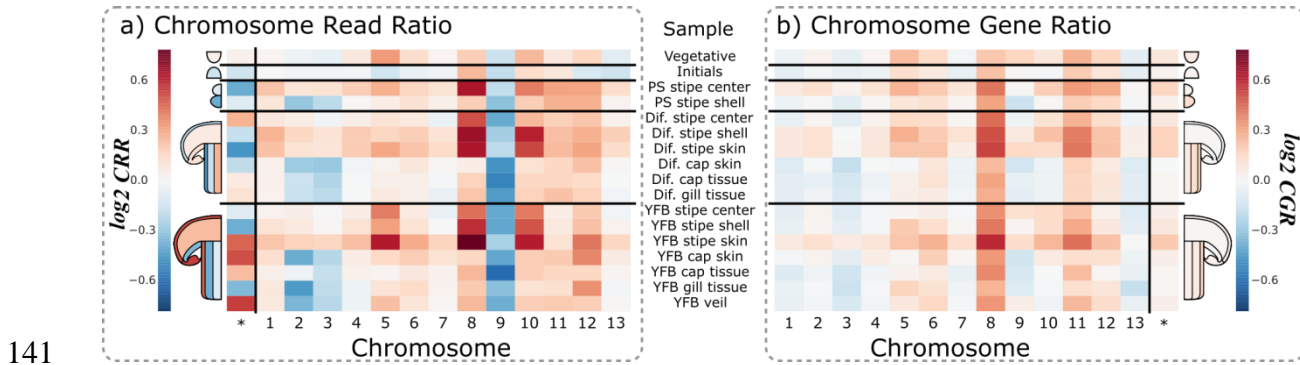

142 *Figure 2: P1 versus P2 expression per chromosome throughout development of the mushroom. A red color indicates a higher P1*  
143 *activity and a blue color indicates a higher P2 activity. Each row indicates a different developmental stage, and each column*  
144 *represents a different chromosome. The column noted with an asterisk is the ratio at the nuclear type level. a) The read count*  
145 *ratios at the chromosome level (CRR, Equation 4). Supplementary Material Note G provides the read count ratios at the*  
146 *chromosome level in the vegetative mycelium dataset. b) The Chromosome Gene Ratios (CGR, Equation 6). See Supplementary*  
147 *Material Note H for the gene ratio measures in the vegetative mycelium dataset.*

148

149 Figure 2a shows the Chromosome Read count Ratios (CRR, Equation 4), demonstrating that  
150 some chromosomes are more active in P1 (e.g. chromosome 8) throughout development, while  
151 others are more active in P2 (e.g. chromosome 9). Expression of other chromosomes depend on  
152 the developmental state, changing in time (e.g. chromosome 2). The chromosome  $\log_2$  fold  
153 changes lie between  $[-0.60, 0.79]$ . In the vegetative mycelium we see less drastic differences in  
154 mRNA production throughout development than in the mushroom tissues, with expression  $\log_2$   
155 fold changes between  $[-0.28, 0.36]$  (see Supplementary Material Notes B).

### 156 **Gene read ratios reveal a dominant P1 type in mushroom tissue, but not in mycelium**

157 To investigate whether either nuclear type is truly dominant we correct for extremely highly  
158 expressed genes (Supplementary Material Note E-F) by limiting their impact on the chromosome  
159 and tissue level ratios by using per-gene activity ratios per chromosome (CGR, Equation 6),  
160 instead of read ratios. This revealed that, in addition to P1 producing more mRNA than P2, P1  
161 karyolleles were also more frequently higher expressed than their P2 counterpart (Figure 2b).



162 Looking across all tissues and chromosomes, P1 is significantly dominant over P2, i.e. the  
163 average of the log-transformed CGR is significantly larger in the P1 nuclear type than the P2  
164 nuclear type, following a t-test in mushroom tissue, with  $p < 0.01$ , (see Supplementary Material  
165 Note G). Using the Chromosome Gene Ratio has a notable impact on chromosome 9. Although  
166 P2 produces most chromosome 9 mRNA (Figure 2a), it is not the case that more P2 karyolleles  
167 are more highly expressed than P1 karyolleles.

168 We do not observe such a dominance of P1 in the mycelium ( $p > 0.05$ , with t-test as in  
169 mushroom dataset), where neither P1 nor P2 show a dominant mRNA activity (see  
170 Supplementary Material Note H).

### 171 **A substantial portion of karyolleles are differentially expressed**

172 In each tissue, we determined the set of karyolleles which are statistically significantly  
173 differentially expressed between the two nuclear types. Although the dominance of the P1  
174 nuclear type indicates a general trend of higher activity across many genes, some karyollele pairs  
175 have a much larger difference pointing towards a functional role. In total, we find 411 genes that  
176 are differentially expressed (see Methods) in a mushroom tissue or in vegetative mycelium  
177 throughout development (Table 1); 368 genes are differentially expressed in mushroom tissues,  
178 and 82 in the vegetative mycelium. The set of differentially expressed genes is enriched in the set  
179 of genes with mixed methylation states (Methods, Supplementary Material Notes I).

180 Interestingly, when a karyollele pair is differentially expressed, with only a few exceptions (see  
181 Supplementary Material Notes J), it will always be observed to be more highly expressed in the  
182 same nuclear type, i.e. if a gene is observed to be more highly expressed in P1 than in P2, than it  
183 will never be observed to be more highly expressed in P2 than in P1 in other tissues, and vice

184 versa. The only exceptions to this rule lies in the set of genes that are differentially expressed in  
185 both the mushroom dataset and the mycelium dataset.

186 The set of differentially higher expressed genes between the nuclear types in mushroom and  
187 mycelium sets overlap with only 39 genes. In this intersection set, more genes are higher  
188 expressed in P2 than in P1. Ten genes had a higher expression in P1, and 24 had a higher  
189 expression in P2. Five were more highly expressed in P2 in the mycelium, but switched their  
190 origin of primary expression to P1 in the mushroom (see Supplementary Material Notes J). The  
191 lack of a substantial overlap of differentially expressed genes between the two nuclear types is  
192 indicative of different regulatory processes during the vegetative stage and a mushroom stage.

193 Although P2 upregulates more differentially expressed genes than P1 does, more genes show a  
194 consistently higher expression in P1 than in P2. We identify consistently higher expressed genes  
195 that show a higher expression in one nuclear type over the other across all samples (Methods). In  
196 the mushroom tissue dataset, we find 1,115 genes that are consistently higher expressed in P1,  
197 and 785 genes that are consistently higher expressed in P2. Similarly, in the vegetative  
198 mycelium, we find 832 genes that are consistently higher expressed in P1 and 645 that are  
199 consistently higher expressed in P2. The two datasets overlap with 470 and 256 genes for P1 and  
200 P2, respectively. Interestingly, Of the 90 named genes in *S. commune* (Methods), only *mnp1* is  
201 differentially expressed and exhibits different behavior in the mushroom and the vegetative  
202 mycelium (see Supplementary Material Note K).

203 *Table 1: Karyolleles differentially expressed between P1 and P2 in mushroom tissue and vegetative mycelium across*  
 204 *development. In the first row we indicate the number of differentially expressed genes that are higher expressed in the different*  
 205 *nuclear types for the two datasets (columns). The second row gives the total number of differentially expressed genes in the two*  
 206 *different datasets. Row three shows the number of differentially expressed genes in a dataset that are not differentially expressed*  
 207 *in the other dataset. In the last row, we show the number of differentially expressed genes that overlap between the two datasets.*

|                       | Mushroom tissue dataset |       | Mycelium tissue dataset |       |
|-----------------------|-------------------------|-------|-------------------------|-------|
|                       | P1 up                   | P2 up | P1 up                   | P2 up |
| <b>Diff. ex.</b>      | 176                     | 193   | 30                      | 52    |
| <b>Total/dataset</b>  | 368                     |       | 82                      |       |
| <b>Unique/dataset</b> | 329                     |       | 43                      |       |
| <b>Overlap</b>        | 39 (411 total)          |       |                         |       |

208

209

210

211

## 212 Co-localized gene clusters are co-regulated

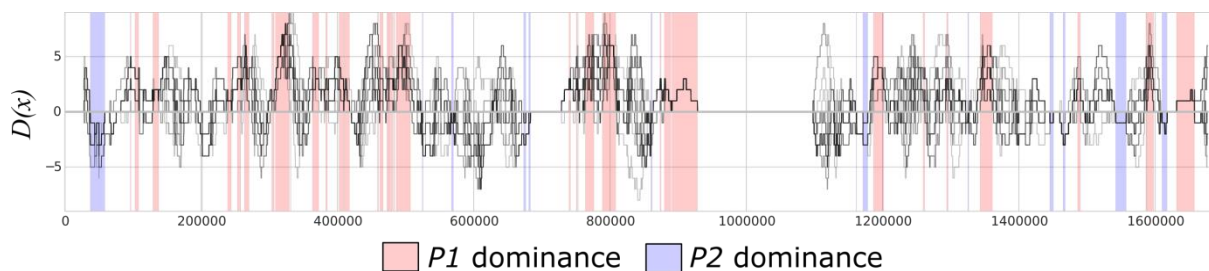

213

214 *Figure 3: Co-localized genes are often co-regulated. Pictured here are the co-localized and co-regulated gene clusters along*  
 215 *chromosome 10 in the mushroom tissue dataset. Along the x-axis is the genomic co-ordinate. For each sample (gray lines), we*  
 216 *plot the difference between the number of genes more highly expressed by P1 and the number of genes more highly expressed by*  
 217 *P2 (Equation 8, a value of 0 indicates an equal distribution). We also highlight the regions that are consistently upregulated in*  
 218 *P1 (red regions) and the number of genes that are consistently upregulated in P2 (blue regions). See Supplementary Material*  
 219 *Note J for other chromosomes.*

220

221 To investigate the level at which genes are regulated, we investigated whether there are regions  
222 where the majority of genes were consistently higher expressed in one homokaryon than in the  
223 other. We detected many of such regions, given in Table 2 and Figure 3 (Methods,  
224 Supplementary Material Note L), hinting towards a sub-chromosomal level of regulation. This is  
225 supported by observations in Figure 2, where we see that within one tissue chromosomes are  
226 differently regulated, excluding a regulation at the nuclear level. Because we observe that co-  
227 regulated gene are co-localized in regions, regulation can also not occur at the chromosome  
228 level, because then we would have expected regions of co-regulation of the size of whole  
229 chromosomes.

230 Co-regulated regions are more frequently upregulated for the P1 karyollele than for the P2  
231 karyolleles. This observation is in agreement with the observed P1 nuclear type dominance. We  
232 observe relatively little overlap between the Mushroom and Vegetative Mycelium datasets  
233 (Table 2), indicative of different regulatory programs between the vegetative mycelium and  
234 mushroom tissue cells.

235 *Table 2: The number of regions in which the majority of the genes are coregulated (Methods), across the mushroom and*  
236 *mycelium datasets and with the number of genes in these regions. P1 and P2 columns indicate whether the region is consistently*  
237 *higher in for the P1 kayollele or the P2 karyollele, respectively. Row Both indicates overlapping regions between the mushroom*  
238 *and vegetative mycelium datasets. Supplementary Material Note L offers detailed expression profiles of these regions.*

| <b>Dataset</b>             | <b>P1</b>       |               | <b>P2</b>       |               |
|----------------------------|-----------------|---------------|-----------------|---------------|
|                            | <b>#Regions</b> | <b>#Genes</b> | <b>#Regions</b> | <b>#Genes</b> |
| <b>Mushroom</b>            | 207             | 741           | 73              | 233           |
| <b>Vegetative Mycelium</b> | 414             | 1955          | 43              | 140           |
| <b>Both</b>                | 151             | 484           | 7               | 17            |

239

240 **Broad range of functionality affected by karyollele specific expression throughout**  
241 **development**

242 Next, we set out to examine the functional annotations of the differentially expressed karyollele  
243 pairs, considering the following categories: (i) transcription factors, (ii) metabolic genes, (iii)  
244 secondary metabolism genes, (iv) cytochrome P450 genes, (v) carbohydrate active enzymes  
245 (cazymes) and (vi) secreted proteins. These categories, with the exception of secondary  
246 metabolite genes, are all enriched in the set of differentiable genes ( $p < 0.05$  by a chi-squared  
247 approximation to the fisher's exact test with FDR correction).

248 Figure 4 show the division of the 411 differentially expressed genes across the functional  
249 categories in all the different samples. None of the differentially expressed genes were  
250 transcription factors. For the other functional categories, we saw a more or less equal amount of  
251 up-regulated karyolleles in P1 and P2 (Figure 4a) in the mushroom tissues (except the vegetative  
252 stage), and a more skewed distribution of activity in the mycelium dataset (and the vegetative  
253 stage of the mushroom dataset). In these cases, P2 had more differentially expressed genes in  
254 these functional categories (Figure 4b).

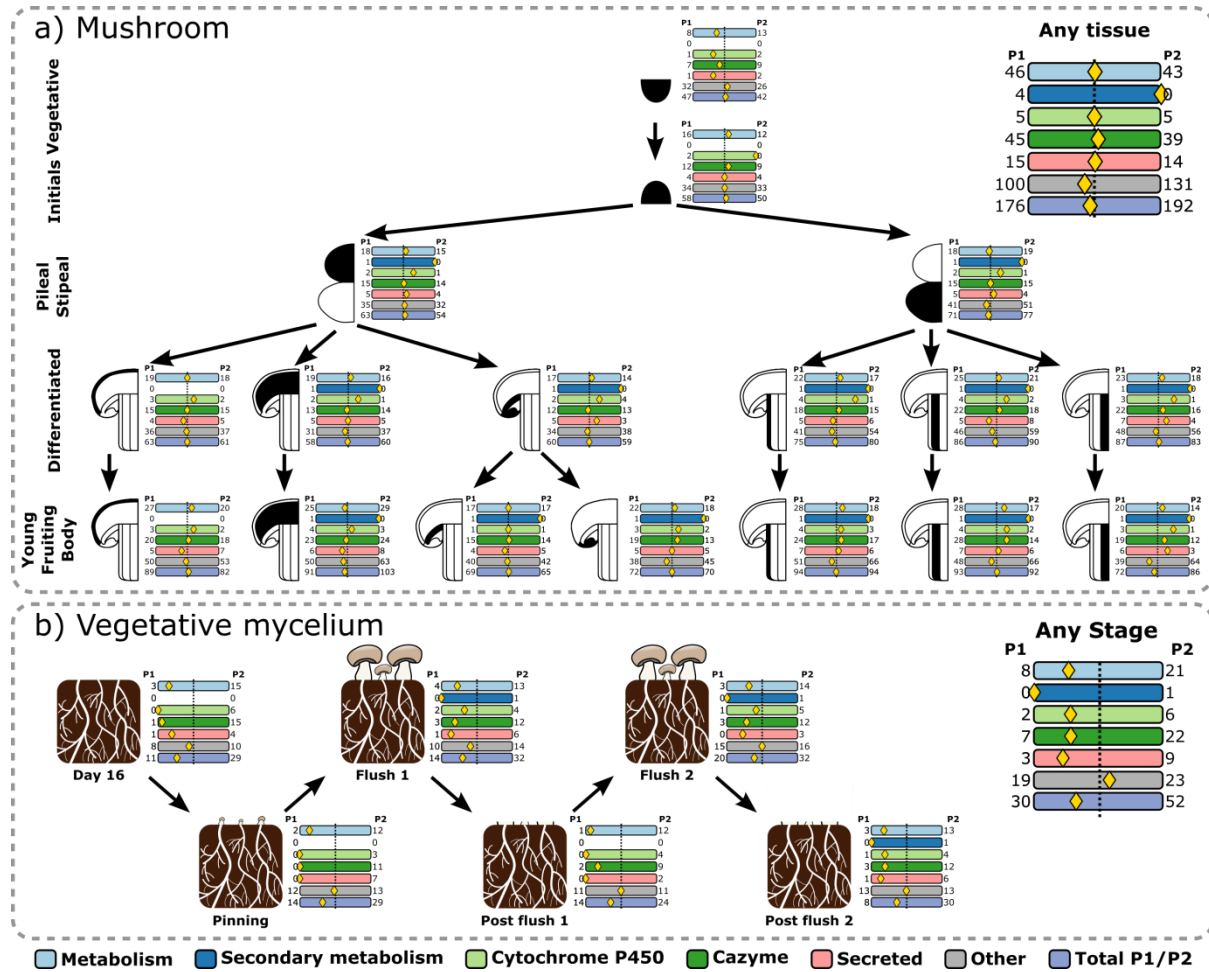

255

256 *Figure 4: Differential regulation of functional groups through mushroom development. The development of different tissues is*  
 257 *illustrated as a tree. We investigate metabolic genes (light blue), secondary metabolic genes (dark blue), cytochrome P450 genes*  
 258 *(light green), carbohydrate active enzymes (dark green), secreted protein genes (light red), and all others not fitting into any of*  
 259 *the previous groups (grey). At each developmental stage, we observe how many genes of each group are differentially*  
 260 *upregulated in P1 (left) and in P2 (right). The yellow diamond indicates the ratio of these counts. a) For the mushroom dataset.*  
 261 *b) For the vegetative mycelium dataset. We see that the groups are more or less equally distributed between P1 and P2 (the*  
 262 *yellow diamond is centered), with the exception of the vegetative stage (the root node of Figure 4A), and the vegetative mycelium*  
 263 *dataset.*

264

265 The P2 type had a higher expression of significantly more karyolleles than P1 in mycelium (see  
 266 Supplementary Material Notes M). In the mycelium, P2 had an enriched expression of  
 267 cytochrome P450 genes, secondary metabolite genes, and cazymes ( $p < 0.05$ , with an FDR  
 268 corrected chi-squared approximation to the fisher's exact test). Furthermore, cazymes and

269 metabolic genes in mycelium were more likely to be more highly expressed in P2 ( $p < 0.05$ , with  
270 an FDR corrected binomial test).

271 Nineteen of the 39 previously identified differentially expressed genes that are shared between  
272 the mycelium and mushroom datasets had the following functional annotations: 14 were  
273 annotated as metabolic genes, 14 as cazymes, five as secreted proteins, and two as cytochrome  
274 P450s (some genes have multiple annotations). Additionally, five of these 39 overlapping genes  
275 have different domain annotations, indicating different functional properties between the P1 and  
276 P2 karyolleles.

277 To further elucidate the functional impact of the 411 differentially expressed genes, we mapped  
278 them onto the KEGG pathway database. Sixteen of the genes that are differentially expressed in  
279 mushroom tissue or vegetative mycelium samples are found in 20 pathways. Interestingly, three  
280 differentially expressed genes are found in the Aminoacyl-tRNA biosynthesis (M00359)  
281 pathway (Supplementary Material Notes N). Two genes belong to valine and methionine tRNAs  
282 pathways and were upregulated in P1. One gene in the pathway producing aspartamine tRNAs  
283 pathway was upregulated in P2. Together, this suggests that P1 is able to produce more valine  
284 and methionine tRNAs than P2.

285 Next we studied whether differential expression of a karyollele also resulted in the production of  
286 a functionally different protein due to sequence differences between the karyolleles. 216 of the  
287 5,090 distinguishable karyolleles had sequence differences that led to an alternative protein  
288 domain annotation, and 36 of these 216 have alternative domain annotations. 36 of these 216  
289 karyollele pairs are differentially expressed between P1 and P2 (see Supplementary Material  
290 Notes O).

## 291 Discussion

292 Differently from most eukaryotes, nuclei remain side by side during most of the life cycle of  
293 basidiomycete fungi. Whether each nucleus is contributing equally to the phenotype and, if not,  
294 how this is regulated is largely unknown. In an attempt to understand this, we studied the  
295 expression of alleles in both constituent nuclei (P1 and P2) of the button mushroom cultivar  
296 Sylvan 15. From the observed average gene expression, we conclude that the expression of  
297 nuclear type P1 of the *Agaricus bisporus* Sylvan A15 strain is dominant over nuclear type P2.  
298 Remarkably, this dominance is present across all developmental stages in the heterokaryon. We  
299 can link this phenomenon to the human case, where in fibroblasts<sup>29</sup>, it has been shown that  
300 individual cells preferentially express one allele over the other, which is not evident over a  
301 collection of many cells. Whereas in a diploid genome the cell must rely on heterochromatin  
302 DNA packing and RNAi regulatory pathways<sup>30</sup>, heterokaryotic cells could instead control the  
303 energy usage of a specific nuclear type.

304 In the mushroom tissue dataset, the number of up-regulated karyolleles in P1 is approximately  
305 equal to those in P2, but in the vegetative mycelium dataset, P2 has more up-regulated  
306 karyolleles relative to P1. The contrast between a dominant P1, yet more differentially over-  
307 expressed genes in P2 in mushroom tissue is paradoxical. However, there are many genes that  
308 show a consistently higher expression in either P1 or P2, with more genes showing a consistently  
309 higher expression for P1. Is it possible that the P1 homokaryon is responsible for the basal  
310 mRNA production, while P2 plays a more reactive regulatory role? Mechanisms for this kind of  
311 regulation are not known. In plants, sub-genome dominance may be linked to methylation of  
312 transposable elements<sup>24</sup>. Might it be possible that something similar happens in *A. bisporus*?



313 Although an imbalance in the number of nuclei could very well explain the dominance of P1, we  
314 have shown that genes that are consistently higher expressed in one of the karyolleles do co-  
315 localize in sub-chromosomal regions. If there were more P1 nuclei than P2 nuclei, we would  
316 have expected a general higher expression of genes of one nuclear type across all chromosomes,  
317 which we do not observe.

318 For many differentially expressed genes, the protein sequence differences between the two  
319 karyolleles in the two nuclear types encode for different protein domains. This suggests a  
320 functional impact of karyollele specific expression. We also observe a broad range of  
321 functionality being differentially expressed between the P1 and the P2 nuclear types. For  
322 example, the P2 upregulation of cazymes and metabolic genes in P2 in compost highlight the  
323 importance of the P2 homokaryon in development. H97, one of the homokaryons in the cultivar  
324 Horst U1, from which Sylvan A15 is derived, displays stronger vegetative growth characteristics  
325 than its counterpart H39<sup>1</sup>. This metabolic strength may be passed down from the H97  
326 homokaryon to the Sylvan A15 P2 homokaryon, and the differentially expressed karyolleles may  
327 in part be responsible for this. *mnp1*, for example, is an important gene for growth on compost  
328 and P2 has indeed inherited the relevant chromosome 2 from H97 (Sonnenberg et al., 2016).  
329 Such characteristics are relevant for breeding strategies.

330 Surprisingly, *mnp1* is expressed and even up-regulated in the mushroom tissues. *mnp1* is known  
331 to be involved in lignin degradation, which occurs in the vegetative mycelium<sup>2,28</sup>. In compost,  
332 the abundance decreases dramatically throughout development (Supplementary Material Note  
333 K). Therefore, the abundance of *mnp1* in the stipe of the fruiting body is unexpected, although it  
334 has been shown that proteins produced in the mycelium can find their way into the mushroom<sup>31</sup>.

335 However, it does not explain the fact that the P1 karyollele exists in higher abundance in the  
336 mushroom tissues, while the P2 karyollele is higher expressed in the vegetative mycelium.  
337 Transport of the P2 karyollele from the vegetative mycelium into the mushroom conflicts with  
338 the abundances of the P1 karyollele observed in the mushroom tissues.

339 A significant proportion of differentially methylated karyolleles were also differentially  
340 expressed, most differentially expressed genes are not observed to be methylated. The overlap  
341 we observe between methylated genes and differentially expressed genes in different  
342 developmental stages explain an effect in the mushroom tissue. However, we cannot link the  
343 methylation to a preference of nuclear type. For example, the five differentially expressed genes  
344 between compost and mushroom that change their nuclear dominance are not methylated.  
345 Although, methylation seems to play a role in the differential use of nuclear type for mRNA  
346 production, it only explains 10% of the observed differential expression. This may be due to a  
347 limitation of our methylation dataset, (which only comprises vegetative growth), but it may also  
348 hint towards other regulatory mechanisms.

349 In addition to methylation, we also observe co-localization of co-expressed genes. This may be  
350 indicative of a difference in genome organization, whereby the DNA is less accessible in certain  
351 regions in P1 than in P2 through different levels of chromatin compaction. It has been shown that  
352 gene expression is strongly linked to DNA availability, and further, that such chromatin  
353 organization is heritable<sup>32</sup>.

354 The sequences of a pair of karyolleles need to be sufficiently different for our algorithm to be  
355 able to uniquely assign reads to each karyollele. These sequence differences between nuclear  
356 types may have an effect on various regulatory mechanisms of transcription, such as

357 transcription factor binding efficiencies, transcription efficiency, differences in mRNA stability,  
358 or differences in epigenetic factors. Future research might shed light on whether these  
359 differences are related to observed differential karyollele expression.

360 Causative mechanisms of karyollele specific expression can further be elucidated by population  
361 studies across multiple spore isolates. Sylvan A15 is derived as a heterokaryotic single spore  
362 isolate from Horst U1. In such heterokaryons, non-sister nuclei are paired in one spore.  
363 Combined with the restriction of recombination to chromosome ends, such heterokaryons are  
364 genetically very similar to the parent and differ only in the distribution of parental type  
365 chromosomes over both nuclei. Karyollele expression could thus be studied in different  
366 heterokaryotic single spore isolates having different distributions of otherwise very similar  
367 chromosomes over both nuclei. If the expression patterns are consistent with nuclear  
368 chromosome organization across different single spore isolates, it will suggest that expression of  
369 specific karyolleles can be controlled by selecting isolates where karyolleles lie in the desired  
370 nuclei.

## 371 **Conclusion**

372 We show that karyolleles, the different copies of a gene separated by nuclear membranes in a  
373 heterokaryon, are differentially expressed between the two different nuclear types in the  
374 *Agaricus bisporus Sylvan A15 strain*. Each nuclear type contributes varying amounts of mRNA  
375 to the cell, and differential expression occurs at the gene level. Despite a dominant P1 type, we  
376 see no evidence that would suggest an imbalance in the number of copies P1 and P2 nuclei in  
377 any cell type, though it may vary from cell to cell.

378 Genes with various vital functions are differentially expressed. The P2 homokaryon significantly  
379 up-regulates cazymes and metabolic genes, which may indicate a difference in vegetative growth  
380 strengths. This corroborates what was observed in the constituent homokaryons of the Horst U1  
381 cultivar from which P1 and P2 are essentially derived.. Manganese peroxidase is one of the  
382 differentially expressed genes, and exhibits interesting, previously unknown behavior. The cause  
383 of these differential regulations is still not known, but it is possible that epigenetic mechanisms,  
384 like methylation, play a role.

385 The biological gene regulation mechanisms between heterokaryons need to be investigated.  
386 Unfortunately, such research is hindered by current mRNA isolation procedures. As mRNA  
387 transcripts are secreted from the nuclei and mixed in the cytoplasm of the cell, traditional  
388 sequencing methods will be unable to generate a full resolution of both homokaryon expression  
389 from full cell isolates. Single nucleus sequencing<sup>33,34</sup> would circumnavigate this issue by  
390 isolating mRNA from individual nuclei. As we have shown that the two nuclear types exhibit  
391 distinguishable regulatory programs, it will be possible to distinguish them based on their  
392 expression profiles.

393 The impact of differential expression between nuclei of heterokaryotic organisms is  
394 underappreciated. Heterokaryotic fungi have major impact in clinical and biotechnological  
395 applications, and impact our economy and society as animal pathogens such as *Cryptococcus*  
396 *neoformans*<sup>35</sup>, plant pathogens such as *Ustilago maydis*<sup>36</sup>, plant and soil symbionts such as  
397 mycorrhizal fungi<sup>26</sup>, bioreactors such as *Schizophyllum commune*<sup>37</sup>, and of course the subject of  
398 this study, the cultivated, edible mushroom *Agaricus bisporus*<sup>15</sup>. It is known that different

399 homokaryons in these species will produce different phenotypes<sup>2</sup> which no doubt need to be  
400 treated, nourished or utilized differently.

401 We have demonstrated differential nuclear regulation of a fungal organism and we showed that  
402 variation between homokaryons results in functional differences that were previously unknown.  
403 With this work, we hope to draw attention to the impact of sequence and regulatory variation in  
404 different nuclei on the function and behavior of the cell in order to further our understanding of  
405 the role of fungi in our environment.

## 406 **Materials and Methods**

407 **RNA-Seq data:** We used two RNA-seq datasets from the *Agaricus bisporus* (A15) strain: (1)  
408 tissue samples through mushroom development (BioProject: PRJNA309475)<sup>27</sup>, and (2)  
409 vegetative mycelium samples taken from compost through mushroom development (BioProject  
410 PRJNA275107)<sup>2</sup>. Throughout the text, when we refer to the mushroom tissue, we also refer to all  
411 samples in dataset (1), including the first sample, which technically is a sample of the vegetative  
412 mycelium. The compost dataset exhibited high amounts of PCR duplicates (Supplementary  
413 Material Note P). This can be attributed to the difficulty in isolating RNA from soil. To remedy  
414 the biases involved with this, we removed all PCR duplicates using FastUniq<sup>38</sup>.

415 **Methylation data:** A sample of vegetative stage mycelium of A15 was treated with the EpiTect  
416 Bisulphite conversion and cleanup kit and sequenced with the Illumina HiSeq 2000. Raw reads  
417 were trimmed using TRIMMOMATIC<sup>39</sup> and aligned to the A15 P1 genome using Bismark<sup>40</sup> and  
418 bowtie2<sup>41</sup>. Methylated bases were analyzed with Methykit<sup>42</sup>. Only bases which had a minimum  
419 coverage of 10 were retained. For samples with mixed methylation states, we will observe what

420 appear to be incomplete conversions of unmethylated cytosines but in reality represents the  
421 mixed methylation states of those bases. Therefore, to include only differentially methylated  
422 bases between the two nuclei (i.e. methylated in one homokaryon, but not in the other), we  
423 considered only those bases which were measured to be methylated between 40 and 60% of all  
424 reads (Supplementary Material Notes I). While 164,290 bases had an indication of methylation  
425 signal, 10,325 bases had methylation signals of about 50%, suggestive of differential methylation  
426 states. Methylated bases were mapped to genes when between the start and stop codons, or  
427 1000bp up/downstream (Supplementary Material Note Q).

428 **Homokaryon genome and annotations:** The P1 and P2 genomes<sup>15</sup> were annotated with  
429 BRAKER1<sup>43</sup> using the pooled RNA-seq data described above. In order to prevent chimeric genes  
430 (neighboring genes that are erroneously fused into one predicted gene) the following procedure  
431 was used. After the first round of gene prediction, predicted introns were identified that were at  
432 least 150 bp in size and not supported by RNA-seq reads. The midpoint of these introns were  
433 labeled as intergenic regions in the next round of gene prediction using AUGUSTUS 3.0.2<sup>44</sup> and  
434 the parameter set produced in the first round of gene prediction. The SNP density between the  
435 genomes was estimated using MUMMER's<sup>45</sup> show-snps tool.

436 **Karyollele pair discovery:** The genome annotations were used to produce predicted mRNA  
437 sequences for each gene. The genes in the two parental genomes were matched using a reciprocal  
438 best BLAST<sup>46</sup> hit. Hits which had E-values greater than  $10^{-100}$  were removed. This resulted in a  
439 conservative orthology prediction between the two homokaryons that are our set of karyolleles.  
440 Karyollele pairs which have a 100% sequence identity were removed, as it would be impossible  
441 to identify distinguishing markers for these identical pairs.

442 **Marker Discovery:** For each discovered karyollele pair, we identify markers that uniquely  
443 identify each element of the pair. This is done by constructing all possible kmers for each  
444 sequence, resulting in two sets per pair. The kmers overlapping in these sets are removed,  
445 resulting in distinguishing pairs of markers. Once distinguishing markers have been discovered  
446 for all pairs, we remove all non-unique markers. Finally, the set of markers is made non  
447 redundant by scanning the position-sorted list of markers from left to right and removing any  
448 marker that overlaps with the previous marker. Finally, we ensure that the markers are unique  
449 throughout the whole genome by removing markers that are present anywhere else in either  
450 genome. In order to guarantee sufficient evidence across the whole gene, we remove karyollele  
451 pairs which do not have at least five markers each.

452 **Marker quantification:** We scan all RNA-Seq reads for the detected markers using the Aho-  
453 Corasick algorithm<sup>47</sup>. We insert all markers and their reverse complements into an Aho-Corasick  
454 tree and count each marker only once for each fragment (a marker may be present twice, if the  
455 read mates overlap). We calculate a gene expression score as the average of each marker count  
456 for a gene. This results in an expression score  $E_h$  for each gene  $g$  in each sample  $t$  for each  
457 replicate  $r$ , per homokaryon  $h$ :

$$458 \quad E_h(r, s, g) = \frac{1}{|M_h(g)|} \sum_{m \in M_h(g)} C_h(r, s, m) \quad (1)$$

459 where  $M_h(g)$  is the set of markers in a gene  $g$ , and  $C_h(r,s,m)$  is the count for marker  $m$  in replicate  
460  $r$ , sample  $s$ .

461 **Differential expression:** Using DE-Seq<sup>48</sup>, we perform a differential expression test for each  
462 karyollele pair in a tissue, i.e. we test if a gene has a differential expression in P1 or P2. DESeq

463 requires a size factor to be calculated, which normalizes for the library sizes of each sample.  
464 Since however, the counts from P1 and from P2 originate from the same sample, these must have  
465 the same size factor. Size factors are therefore calculated manually, by counting the total number  
466 of reads for each sample, and dividing it by the largest value for any sample (Equation 2).

$$sf(s, r) = \frac{\sum_h \sum_{m \in M_h(g)} C_h(r, s, m)}{\max_{(s', r')} \left( \sum_h \sum_{m \in M_h(g)} C_h(r', s', m) \right)} \quad (2)$$

467  
468 The P1 and P2 counts originating from the same sample will then be assigned the same size  
469 factor. The expression counts for each gene in each replicate in each tissue (equation 1) are  
470 provided to DE-Seq with the provided size factor (Equation 2). The normalized read counts per  
471 gene  $D_h(s, g)$  are returned by DE-Seq, together with significance values for each test. We select  
472 only differentially expressed genes that have a q-value  $< 0.05$ , and a fold change of at least three.

473 **Read ratio calculation:** Using the normalized read counts from DE-Seq<sup>48</sup>, we calculate the  
474 ratio of the number of reads originating from the two homokaryons at the gene (GRR),  
475 chromosome (CRR) and nuclear type level (NRR).

476



$$GRR(s, g) = \frac{D_{P1}(s, g)}{D_{P2}(s, g)} \quad (3)$$

$$CRR(s, c) = \frac{\sum_{g \in c} D_{P1}(s, g)}{\sum_{g \in c} D_{P2}(s, g)} \quad (4)$$

$$NRR(s) = \frac{\sum_{c \in C} \sum_{g \in c} D_{P1}(s, g)}{\sum_{c \in C} \sum_{g \in c} D_{P2}(s, g)} \quad (5)$$

477

478 **Gene ratio calculation:** Using the normalized read counts from DESeq<sup>48</sup>, we calculate the ratio  
 479 of the number of reads originating from the two homokarons at the gene level, and use those  
 480 ratios to calculate the geometric mean of the relative expression activities at the chromosome  
 481 (CGR, Equation 6) and nuclear type level (NGR, Equation 7). The geometric mean is more  
 482 suitable than the arithmetic mean for averaging ratios.

$$CGR(s, c) = \sqrt[|c|]{\prod_{g \in c} GRR(s, g)} \quad (6)$$

$$NGR(s) = \sqrt[|C|]{\prod_{c \in C} CGR(s, c)} \quad (7)$$

483

484 **Identifying consistent genes:** For each gene, we observe the relative expression in each sample  
 485 (Equation 3). We refer to a gene as being consistently expressed if it is more highly expressed in  
 486 the same nuclear type in each sample. I.e. the GRR is always greater than one, or always less  
 487 than 1.

488 **Identifying co-regulated clusters:** We slide a window of size 20,001bp (10,000- up and down-  
 489 stream) across each chromosome. In this window, we count the number of genes that are more  
 490 highly expressed by P1 and by P2, and calculate the difference per sample. I.e.

491 
$$D(x, s) = \sum_{g \in W(x-10000, x+10000)} \begin{cases} 1 & \text{if } GRR(g, s) > 1 \\ -1 & \text{if } GRR(g, s) < 1 \end{cases} \quad (8)$$

492 where  $W(x,y)$  is the set of genes between genomic location  $x$  and  $y$ , and  $s$  is a sample. This  
493 difference is shown in Figure 3. Next, we identify regions where each sample in the dataset  
494 shows consistent regulation. That is to say, in these regions,  $D(x,s) > 0 \forall s \in S$ , or  $D(x,s) < 0 \forall s$   
495  $\in S$ , where  $S$  is the set of all samples. These regions contain co-localized genes that are co-  
496 regulated across all samples.

497 **Functional predictions:**

498 **PFAM:** Conserved protein domains were predicted using PFAM version 27<sup>49,50</sup>.

499 **Transcription factor definitions:** Predicted proteins with a known transcription factor-related  
500 (DNA-binding) domain (based on the PFAM annotations) were considered to be transcription  
501 factors.

502 **Carbohydrate-active enzymes prediction:** Using the Cazymes Analysis Toolkit (CAT)<sup>51</sup>, we  
503 predicted carbohydrate-active enzymes based on the original gene definitions. If a gene's protein  
504 sequence was predicted to be a cazyme by either the sequence-based annotation method or the  
505 PFAM-based annotation method then we considered it a cazyme.

506 **Secreted Proteins prediction:** We used the same procedure as<sup>52</sup> to predict secreted proteins.  
507 Briefly, genes with SignalP<sup>53</sup> signal peptides, or a TargetP<sup>54</sup> Loc=S were kept. The remaining  
508 genes were further filtered with TMHMM<sup>55</sup>, keeping only genes with zero or one

509 transmembrane domains. Finally, genes were filtered using Wolf PSort<sup>56</sup> to select genes with a  
510 Wolf PSort extracellular score greater than 17.

511 **Metabolic and Cytochrome P450 gene groups:** Genes with the GO annotation “metabolic  
512 process” (annotation ID: GO:0008152) were called as metabolism genes. Genes with the PFAM  
513 annotation PF00067 were used as Cytochrome P450 genes.

514 **KEGG:** KEGG annotations were made with the KAAS KEGG<sup>57</sup> annotation pipeline, using  
515 genes from all available fungi, with the exception of leotiomycetes, Dothideomycetes, and  
516 Microsporidians, due to the limitation of the number of species (Selected organisms by ID: cne,  
517 cgi, ppl, mpr, scm, uma, mgl, sce, ago, kla, vpo, zro, cgr, ncs, tpf, ppa, dha, pic, pgu, lel, cal, yli,  
518 clu, ncr, mgr, fgr, nhe, maw, ani, afm, aor, ang, nfi, pcs, cim, cpw, pbl, ure, spo, tml). The  
519 GHOSTX and BBH options were selected. Predictions were made individually for both the P1  
520 and P2 genomes, using the translated protein sequences.

521 **Named genes:** Named genes for *Agaricus bisporus* version 2 were downloaded from the JGI  
522 DOE Genome Portal ([http://genome.jgi.doe.gov/pages/search-for-](http://genome.jgi.doe.gov/pages/search-for-genes.jsf?organism=Agabi_varbisH97_2)  
523 [genes.jsf?organism=Agabi\\_varbisH97\\_2](http://genome.jgi.doe.gov/pages/search-for-genes.jsf?organism=Agabi_varbisH97_2)) by searching for genes with ‘Name’ in the ‘user  
524 annotations’ attribute. Gene names were transferred from *A. bisporus* v. 2 using reciprocal best  
525 blast hit to P1 and P2, and then selecting the best match (in the single case of an ambiguity). See  
526 Supplementary Material Note R.

527 **Software and code availability:** Marker discovery and abundance calculations was done in  
528 Scala, while downstream analysis was performed in python using the ibidas data query and

529 manipulation suite<sup>58</sup>. All source code, together with a small artificial example dataset is  
530 available at: <https://github.com/thiesgehrmann/Homokaryon-Expression>

531 **Data Availability:** The RNA-Seq data was previously generated and can be found at bioprojects  
532 PRJNA309475 and PRJNA275107. The bisulphite sequencing data can be accessed at  
533 SAMN06284058.

534 **Supplementary information:** Together with this manuscript, we provide a file of  
535 Supplementary Notes, and Supplementary Tables 1-4 to support our findings.

### 536 **Acknowledgements**

537 The authors would like to thank Brian Lavrijssen for providing the bisulphite sequencing data to  
538 determine the differential methylation states. The sequence and annotation data of *A. bisporus*  
539 H97 version 2 were produced by the US Department of Energy Joint Genome Institute  
540 <http://www.jgi.doe.gov/> in collaboration with the user community. This research is supported by  
541 the Dutch Technology Foundation STW, which is part of the Netherlands Organisation for  
542 Scientific Research (NWO), and which is partly funded by the Ministry of Economic Affairs.

### 543 **Author contributions**

544 TG, HABW, MJTR and TA wrote the manuscript. JFP performed the experiments. TG, HABW,  
545 MJTR and TA designed the analyses. RAO created the gene and functional annotations. TG  
546 performed the analyses. All authors aided in biological interpretation of the results. All authors  
547 reviewed the manuscript.

### 548 **Conflict of interest**

549 The authors declare no conflicts of interest

## 550 **References**

- 551 1. Morin, E. *et al.* Genome sequence of the button mushroom *Agaricus bisporus* reveals  
552 mechanisms governing adaptation to a humic-rich ecological niche. *Proc. Natl. Acad. Sci.*  
553 **109**, 17501–17506 (2012).
- 554 2. Patyshakuliyeva, A. *et al.* Uncovering the abilities of *Agaricus bisporus* to degrade plant  
555 biomass throughout its life cycle. *Environ. Microbiol.* **17**, 3098–3109 (2015).
- 556 3. Ohm, R. a *et al.* Genome sequence of the model mushroom *Schizophyllum commune*.  
557 *Nat. Biotechnol.* **28**, 957–63 (2010).
- 558 4. Pawlowska, T. E. Genetic processes in arbuscular mycorrhizal fungi. *FEMS Microbiol.*  
559 *Lett.* **251**, 185–192 (2005).
- 560 5. ud din Khanday, M. *et al.* in *Soil Science: Agricultural and Environmental Prospectives*  
561 317–332 (Springer International Publishing, 2016). doi:10.1007/978-3-319-34451-5\_14
- 562 6. Sun, C. *et al.* The beneficial fungus *Piriformospora indica* protects *Arabidopsis* from  
563 *Verticillium dahliae* infection by downregulation plant defense responses. *BMC Plant*  
564 *Biol.* **14**, 268 (2014).
- 565 7. Harrach, B. D., Baltruschat, H., Barna, B., Fodor, J. & Kogel, K.-H. The mutualistic  
566 fungus *Piriformospora indica* protects barley roots from a loss of antioxidant capacity  
567 caused by the necrotrophic pathogen *Fusarium culmorum*. *Mol. Plant. Microbe. Interact.*  
568 **26**, 599–605 (2013).

- 569 8. Babikova, Z. *et al.* Underground signals carried through common mycelial networks warn  
570 neighbouring plants of aphid attack. *Ecol. Lett.* n/a-n/a (2013). doi:10.1111/ele.12115
- 571 9. Collins, C. *et al.* Genomic and proteomic dissection of the ubiquitous plant pathogen,  
572 armillaria mellea: Toward a new infection model system. *J. Proteome Res.* **12**, 2552–2570  
573 (2013).
- 574 10. Khoshraftar, S. *et al.* Sequencing and annotation of the Ophiostoma ulmi genome. *BMC*  
575 *Genomics* **14**, 162 (2013).
- 576 11. Guo, L. *et al.* Genome and transcriptome analysis of the fungal pathogen fusarium  
577 oxysporum f. Sp. Cubense causing banana vascular wilt disease. *PLoS One* **9**, (2014).
- 578 12. Specht, C. A. Isolation of the Ba and Bb mating-type loci of Schizophyllum commune.  
579 *Curr. Genet.* **28**, 374–379 (1995).
- 580 13. Saksena, K. N., Marino, R., Haller, M. N. & Lemke, P. a. Study on development of  
581 Agaricus bisporus by fluorescent microscopy and scanning electron microscopy. *J.*  
582 *Bacteriol.* **126**, 417–428 (1976).
- 583 14. Craig, G. D., Newsam, R. J., Gull, K. & Wood, D. A. An ultrastructural and  
584 autoradiographic study of stipe elongation in Agaricus bisporus. *Protoplasma* **98**, 15–29  
585 (1979).
- 586 15. Sonnenberg, A. S. M. *et al.* A detailed analysis of the recombination landscape of the  
587 button mushroom Agaricus bisporus var. bisporus. *Fungal Genet. Biol.* **93**, 35–45 (2016).
- 588 16. Todd, R. B., Davis, M. a & Hynes, M. J. Genetic manipulation of Aspergillus nidulans:

- 589 heterokaryons and diploids for dominance, complementation and haploidization analyses.  
590 *Nat. Protoc.* **2**, 822–830 (2007).
- 591 17. Boon, E., Zimmerman, E., Lang, B. F. & Hijri, M. Intra-isolate genome variation in  
592 arbuscular mycorrhizal fungi persists in the transcriptome. *J. Evol. Biol.* **23**, 1519–1527  
593 (2010).
- 594 18. James, T. Y., Stenlid, J., Olson, ??Ke & Johannesson, H. Evolutionary significance of  
595 imbalanced nuclear ratios within heterokaryons of the basidiomycete fungus  
596 *Heterobasidion parviporum*. *Evolution (N. Y.)*. **62**, 2279–2296 (2008).
- 597 19. Muzzey, D., Sherlock, G. & Weissman, J. S. Extensive and coordinated control of allele-  
598 specific expression by both transcription and translation in *Candida albicans*. *Genome Res.*  
599 **24**, 963–973 (2014).
- 600 20. Wei, X. & Wang, X. A computational workflow to identify allele-specific expression and  
601 epigenetic modification in maize. *Genomics. Proteomics Bioinformatics* **11**, 247–52  
602 (2013).
- 603 21. Crowley, J. J. *et al.* Analyses of allele-specific gene expression in highly divergent mouse  
604 crosses identifies pervasive allelic imbalance. *Nat. Genet.* **47**, 353–360 (2015).
- 605 22. Buckland, P. R. Allele-specific gene expression differences in humans. *Hum. Mol. Genet.*  
606 **13**, 255–260 (2004).
- 607 23. Pant, P. V. K. *et al.* Analysis of allelic differential expression in human white blood cells.  
608 *Genome Res.* **16**, 331–339 (2006).

- 609 24. Edger, P. P., Smith, R., Mckain, M. R., Cooley, A. M. & Vallejo-marin, M. Subgenome  
610 dominance in an interspecific hybrid , synthetic allopolyploid , and a 140 year old  
611 naturally established neo-allopolyploid monkeyflower. *bioRxiv* 1–27 (2016).  
612 doi:10.1101/094797
- 613 25. Horton, T. R. The number of nuclei in basidiospores of 63 species of ectomycorrhizal  
614 Homobasidiomycetes. *Mycologia* **98**, 233–238 (2006).
- 615 26. Lin, K. *et al.* Single Nucleus Genome Sequencing Reveals High Similarity among Nuclei  
616 of an Endomycorrhizal Fungus. *PLoS Genet.* **10**, (2014).
- 617 27. Pelkmans, J. F. *et al.* The transcriptional regulator c2h2 accelerates mushroom formation  
618 in *Agaricus bisporus*. *Appl. Microbiol. Biotechnol.* **2**, (2016).
- 619 28. Bonnen, A. M., Anton, L. L. H., Orth, A. B., Anton, L. L. H. & Orth, A. N. N. B. Lignin-  
620 degrading enzymes of the commercial button mushroom, *Agaricus bisporus*. *Appl.*  
621 *Environ. Microbiol.* **60**, 960–965 (1994).
- 622 29. Borel, C. *et al.* Biased allelic expression in human primary fibroblast single cells. *Am. J.*  
623 *Hum. Genet.* **96**, 70–80 (2015).
- 624 30. Volpe, T. A. *et al.* Regulation of heterochromatic silencing and histone H3 lysine-9  
625 methylation by RNAi. *Science* **297**, 1833–7 (2002).
- 626 31. Woolston, B. M. *et al.* Long-distance translocation of protein during morphogenesis of the  
627 fruiting body in the filamentous fungus, *agaricus bisporus*. *PLoS One* **6**, (2011).
- 628 32. McDaniell, R. *et al.* Heritable Individual-Specific and Allele-Specific Chromatin



- 629 Signatures in Humans. *Science* (80-. ). **328**, 235–239 (2010).
- 630 33. Lake, B. B. *et al.* Neuronal subtypes and diversity revealed by single-nucleus RNA  
631 sequencing of the human brain. *Science* (80-. ). **352**, 1586–1590 (2016).
- 632 34. Krishnaswami, S. R. *et al.* Using single nuclei for RNA-seq to capture the transcriptome  
633 of postmortem neurons. *Nat. Protoc.* **11**, 499–524 (2016).
- 634 35. Loftus, B. J. *et al.* The genome of the basidiomycetous yeast and human pathogen  
635 *Cryptococcus neoformans* TL - 307. *Science* (80-. ). **307** VN-, 1321–1324 (2005).
- 636 36. Kämper, J. *et al.* Insights from the genome of the biotrophic fungal plant pathogen  
637 *Ustilago maydis*. *Nature* **444**, 97–101 (2006).
- 638 37. Shu, C. H. & Hsu, H. J. Production of schizophyllan glucan by *Schizophyllum commune*  
639 ATCC 38548 from detoxified hydrolysate of rice hull. *J. Taiwan Inst. Chem. Eng.* **42**,  
640 387–393 (2011).
- 641 38. Xu, H. *et al.* FastUniq: A Fast De Novo Duplicates Removal Tool for Paired Short Reads.  
642 *PLoS One* **7**, 1–6 (2012).
- 643 39. Bolger, A. M., Lohse, M. & Usadel, B. Trimmomatic: A flexible trimmer for Illumina  
644 sequence data. *Bioinformatics* **30**, 2114–2120 (2014).
- 645 40. Krueger, F. & Andrews, S. R. Bismark: A flexible aligner and methylation caller for  
646 Bisulfite-Seq applications. *Bioinformatics* **27**, 1571–1572 (2011).
- 647 41. Langmead, B. & Salzberg, S. L. Fast gapped-read alignment with Bowtie 2. *Nat. Methods*  
648 **9**, 357–359 (2012).

- 649 42. Akalin, A. *et al.* methylKit: a comprehensive R package for the analysis of genome-wide  
650 DNA methylation profiles. *Genome Biol.* **13**, R87 (2012).
- 651 43. Hoff, K. J., Lange, S., Lomsadze, A., Borodovsky, M. & Stanke, M. BRAKER1:  
652 Unsupervised RNA-Seq-Based Genome Annotation with GeneMark-ET and  
653 AUGUSTUS: Table 1. *Bioinformatics* **32**, 767–769 (2016).
- 654 44. Stanke, M., Diekhans, M., Baertsch, R. & Haussler, D. Using native and syntenically  
655 mapped cDNA alignments to improve de novo gene finding. *Bioinformatics* **24**, 637–644  
656 (2008).
- 657 45. Kurtz, S. *et al.* Versatile and open software for comparing large genomes. *Genome Biol.* **5**,  
658 R12 (2004).
- 659 46. Altschul, S. F., Gish, W., Miller, W., Myers, E. W. & Lipman, D. J. Basic local alignment  
660 search tool. *J. Mol. Biol.* **215**, 403–10 (1990).
- 661 47. Aho, A. V. & Corasick, M. J. Efficient string matching: an aid to bibliographic search.  
662 *Commun. ACM* **18**, 333–340 (1975).
- 663 48. Anders, S. *et al.* Differential expression analysis for sequence count data. *Genome Biol.*  
664 **11**, R106 (2010).
- 665 49. Finn, R. D. *et al.* The Pfam protein families database. *Nucleic Acids Res.* **36**, D281–D288  
666 (2008).
- 667 50. Finn, R. D. *et al.* Pfam: The protein families database. *Nucleic Acids Res.* **42**, 222–230  
668 (2014).

- 669 51. Lombard, V., Golaconda Ramulu, H., Drula, E., Coutinho, P. M. & Henrissat, B. The  
670 carbohydrate-active enzymes database (CAZy) in 2013. *Nucleic Acids Res.* **42**, D490–  
671 D495 (2014).
- 672 52. Morais do Amaral, A., Antoniw, J., Rudd, J. J. & Hammond-Kosack, K. E. Defining the  
673 Predicted Protein Secretome of the Fungal Wheat Leaf Pathogen *Mycosphaerella*  
674 *graminicola*. *PLoS One* **7**, 1–19 (2012).
- 675 53. Petersen, T. N., Brunak, S., von Heijne, G. & Nielsen, H. SignalP 4.0: discriminating  
676 signal peptides from transmembrane regions. *Nat. Methods* **8**, 785–786 (2011).
- 677 54. Emanuelsson, O., Nielsen, H., Brunak, S. & von Heijne, G. Predicting Subcellular  
678 Localization of Proteins Based on their N-terminal Amino Acid Sequence. *J. Mol. Biol.*  
679 **300**, 1005–1016 (2000).
- 680 55. Krogh, A., Larsson, B., von Heijne, G. & Sonnhammer, E. L. . Predicting transmembrane  
681 protein topology with a hidden markov model: application to complete genomes. *J. Mol.*  
682 *Biol.* **305**, 567–580 (2001).
- 683 56. Horton, P. *et al.* WoLF PSORT: protein localization predictor. *Nucleic Acids Res.* **35**,  
684 W585–W587 (2007).
- 685 57. Moriya, Y., Itoh, M., Okuda, S., Yoshizawa, A. C. & Kanehisa, M. KAAS: An automatic  
686 genome annotation and pathway reconstruction server. *Nucleic Acids Res.* **35**, 182–185  
687 (2007).
- 688 58. Hulsman, M., Bot, J. J., Vries, A. P. de & Reinders, M. J. T. Ibibas: Querying Flexible

689 Data Structures to Explore Heterogeneous Bioinformatics Data. *Data Integr. Life Sci.* 23–  
690 37 (2013). doi:10.1007/978-3-642-39437-9\_2

691

692
